# Supplementary material for: Antidiabetic Activity of Elephant Grass (Cenchrus Purpureus (Schumach.) Morrone) via Activation of PI3K/AkT Signaling Pathway, Oxidative Stress Inhibition, and Apoptosis in Wistar Rats
Source: PubMed Central journal article supplement (PMC8924541; doi:10.3389/fphar.2022.845196), 2022-03-02
Supplement: Image1.pdf [file Image1.pdf]

# Antidiabetic activity of Elephant grass (*Cenchrus purpureus* (Schumach.) Morrone) via activation of PI3K/AkT signaling pathway, oxidative stress inhibition, and apoptosis in Wistar rats

Oluwafemi Adeleke Ojo<sup>1\*</sup>, Abosede Itunuoluwa Oni<sup>1</sup>, Susan Grant<sup>1</sup>, Jennifer Amanze<sup>1</sup>, Adebola Busola Ojo<sup>2</sup>, Odunayo Anthonia Taiwo<sup>3</sup>, Rodelwma Fibilis Maimako<sup>1</sup>, Ikponmwosa Owen Evbuomwan<sup>4</sup>, Matthew Iyobhebhe<sup>1</sup>, Charles Obiora Nwonuma<sup>1</sup>, Omorefosa Osemwegie<sup>4</sup>, Anthonia Oluyemi Agboola<sup>5</sup>, Christopher Akintayo<sup>6</sup> Nnaemeka Tobechukwu Asogwa<sup>7</sup>, Nada H. Aljarba<sup>8</sup>, Saad Alkahtani<sup>9</sup>, Gomaa Mostafa-Hedeab<sup>10</sup> Gaber El-Saber Batiha<sup>11</sup>, Oluyomi Stephen Adeyemi<sup>1</sup>

<sup>1</sup> Department of Biochemistry, Landmark University, PMB 1001, Omu-Aran, Nigeria

<sup>2</sup> Department of Biochemistry, Ekiti State University, Ado-Ekiti, Nigeria

<sup>3</sup> Department of Biochemistry, Chrisland University, Abeokuta, Nigeria

<sup>4</sup> Department of Microbiology, Landmark University, PMB 1001, Omu-Aran, Nigeria

<sup>5</sup> Department of Biochemistry, Wesley University, Ondo, Nigeria

<sup>6</sup> Department of Physiology, Afe Babalola University, Ado-Ekiti, Nigeria

<sup>7</sup> Central Research Laboratory 123B, University Road, Tanke Ilorin, Nigeria

<sup>8</sup> Department of Biology, College of Science, Princess Nourah bint Abdulrahman University, Riyadh 11671, Saudi Arabia

<sup>9</sup> Department of Zoology, College of Science, King Saud University, Riyadh, Saudi Arabia

<sup>10</sup> Department of Pharmacology and Health Research Unit, Jouf University, Saudi Arabia

<sup>11</sup> Department of Pharmacology and Therapeutics, Faculty of Veterinary Medicine, Damanhour University, Damanhour, AlBeheira 22511, Egypt.

\*Corresponding author address: [oluwafemiadeleke08@gmail.com](mailto:oluwafemiadeleke08@gmail.com); Tel: +2347037824647

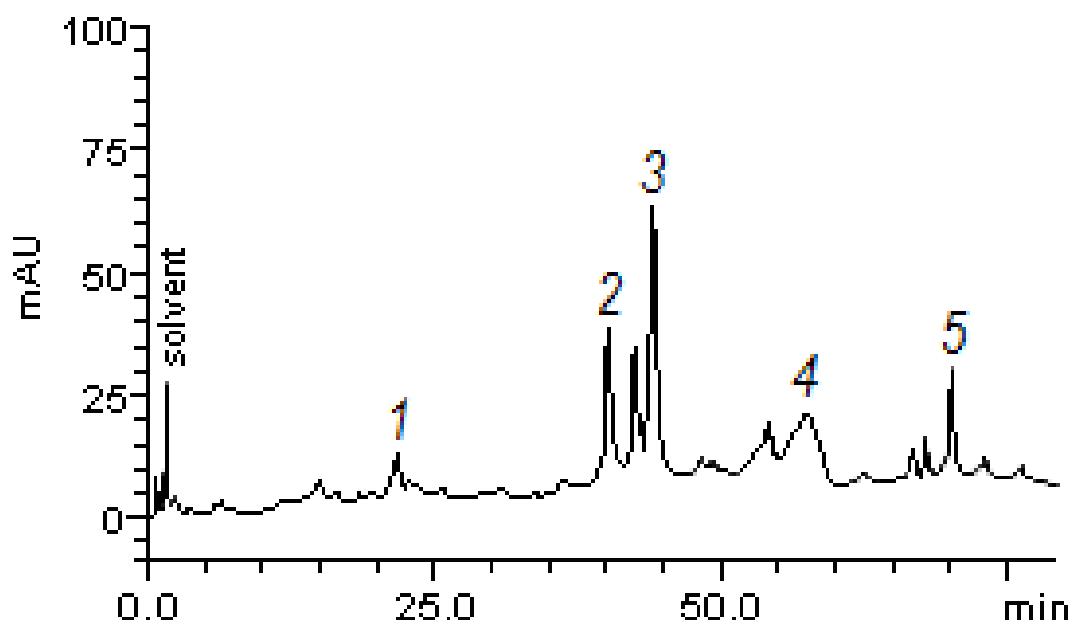

**Figure S1:** HPLC chromatogram of AECPS. Rutin (peak 1), ellagic acid (peak 2), 3-O-rutinoside (peak 3), catechin (peak 4) and kaempferol (peak 5).

**Legend:** AECPS: aqueous extract of *Cenchrus purpureus* shoots
